# Supplementary material for: A targeted biocompatible organic nanoprobe for photoacoustic and near-infrared-II fluorescence imaging in living mice
Source: Royal Society of Chemistry journal article supplement (doi:10.1039/c8ra08163h), 2019-01-01
Supplement: c8ra08163h1.pdf [file c8ra08163h1.pdf]

# Supporting Information

## **A Targeted Biocompatible Organic Nanoprobe for Photoacoustic and Near-Infrared-II Fluorescence Imaging in Living Mice**

Xinhui Xie <sup>1\*</sup>, Yili Hu <sup>1</sup>, Chao Zhang <sup>2</sup>, Jialei Song <sup>1</sup>, Suyang Zhuang <sup>1</sup>, and Yuntao Wang <sup>1</sup>

*<sup>1</sup>The Department of Orthopedics, Zhong Da hospital, School of Medicine, Southeast University, Nanjing, Jiangsu, 210009, China.*

*<sup>2</sup>Collaborative Innovation Center of Chemistry for Life Sciences, College of Engineering and Applied Sciences, Nanjing University, Nanjing, Jiangsu, 210093, China.*

*\*The author is corresponding author. Email: [xiexinghuixh@163.com](mailto:xiexinghuixh@163.com).*

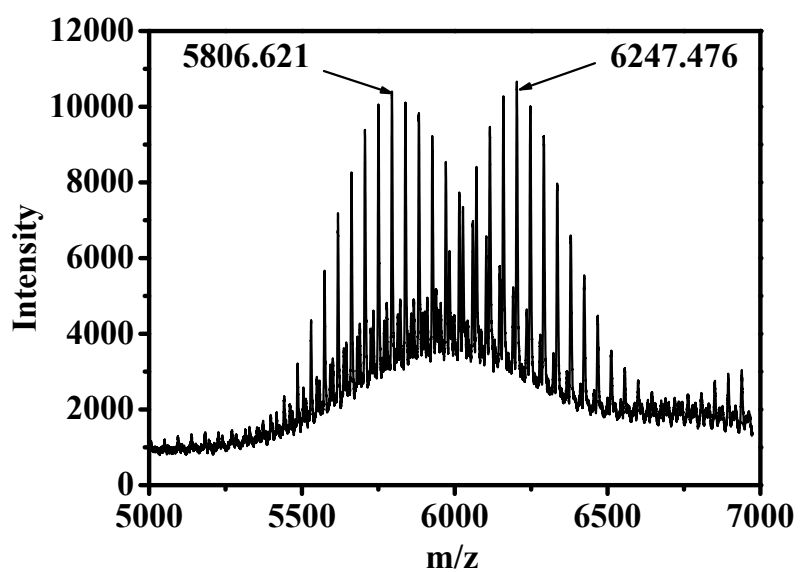

**Figure S1.** MALDI-TOF spectrum of IR-PEG-FA.

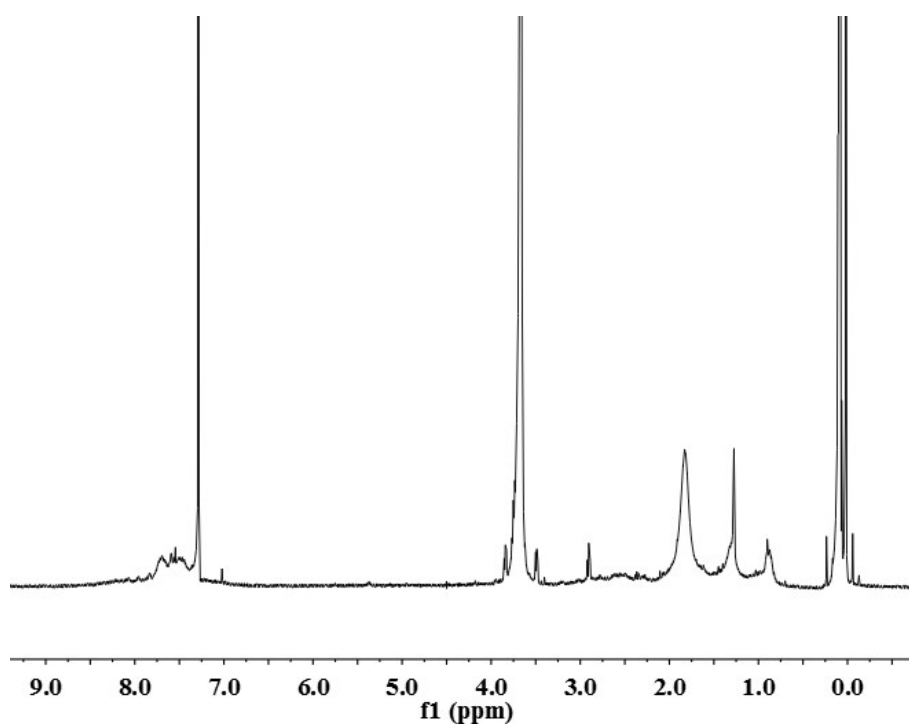

**Figure S2.** <sup>1</sup>H-NMR spectrum of IR-PEG.

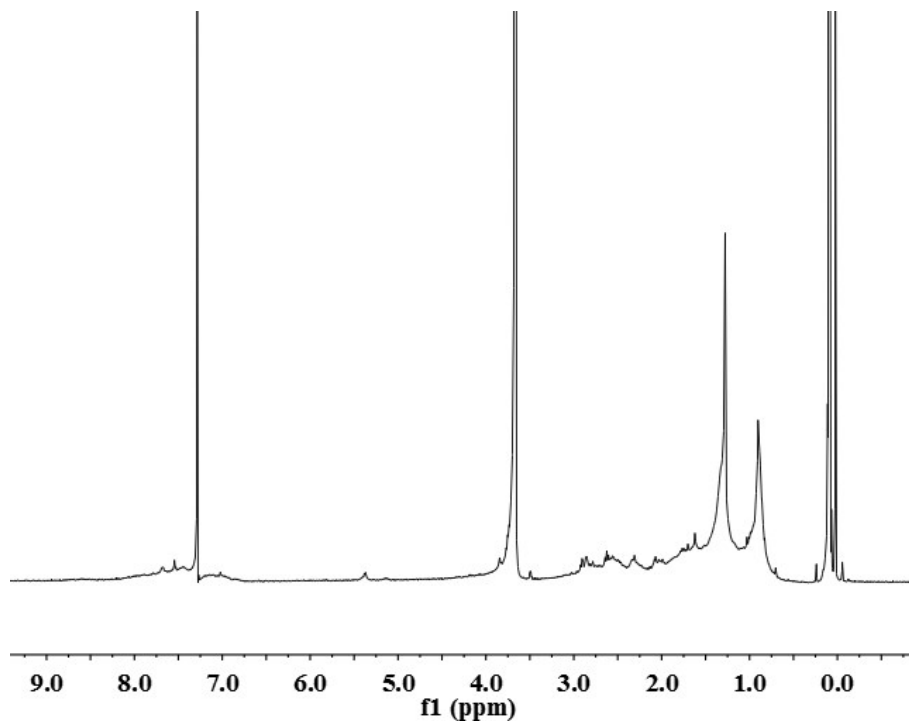

**Figure S3.**  $^1\text{H}$ -NMR spectrum of IR-PEG-FA.

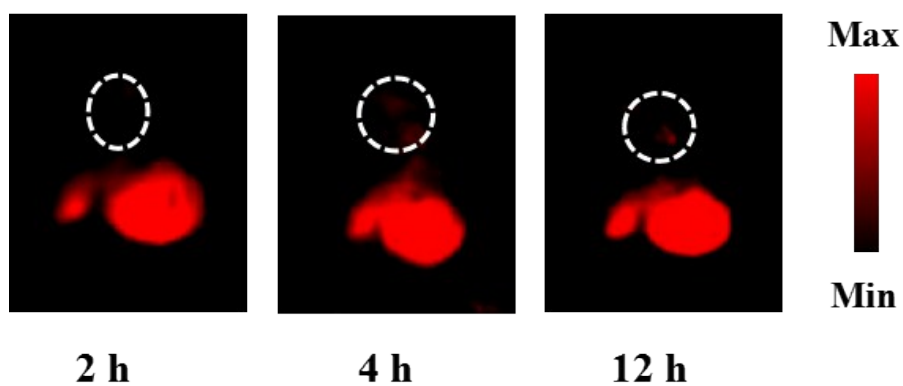

**Figure S4.** In vivo NIR-II imaging of tumor mice at series of time points after tail intravenous injection with **IR-PEG**. As shown in these images, a weak fluorescence signal was observed in the tumor sites after tail vein injection with **IR-PEG** mainly owing to the enhanced permeation and retention (EPR) effect. While the tumor area showed a bright and strong NIR-II fluorescence signal after systemic injection with **IR-PEG-FA** (**Figure 4D**) which indicated the targeted contrast agent

**(IR-PEG-FA)** possesses more tumor-specific targeting performance owing to the both active and passive tumor targeting.
